# Supplementary material for: Modulatory Effect of Guinep (Melicoccus bijugatus Jacq) Fruit Pulp Extract on Isoproterenol-Induced Myocardial Damage in Rats. Identification of Major Metabolites Using High Resolution UHPLC Q-Orbitrap Mass Spectrometry
Source: MDPI journal article supplement (doi:10.3390/molecules24020235), 2019-01-10

## Supplementary material

**Figure S1: Quadrupole Orbitrap full MS spectra and structures of all detected compounds, in fruits of *Melicoccus bijugatus*.**

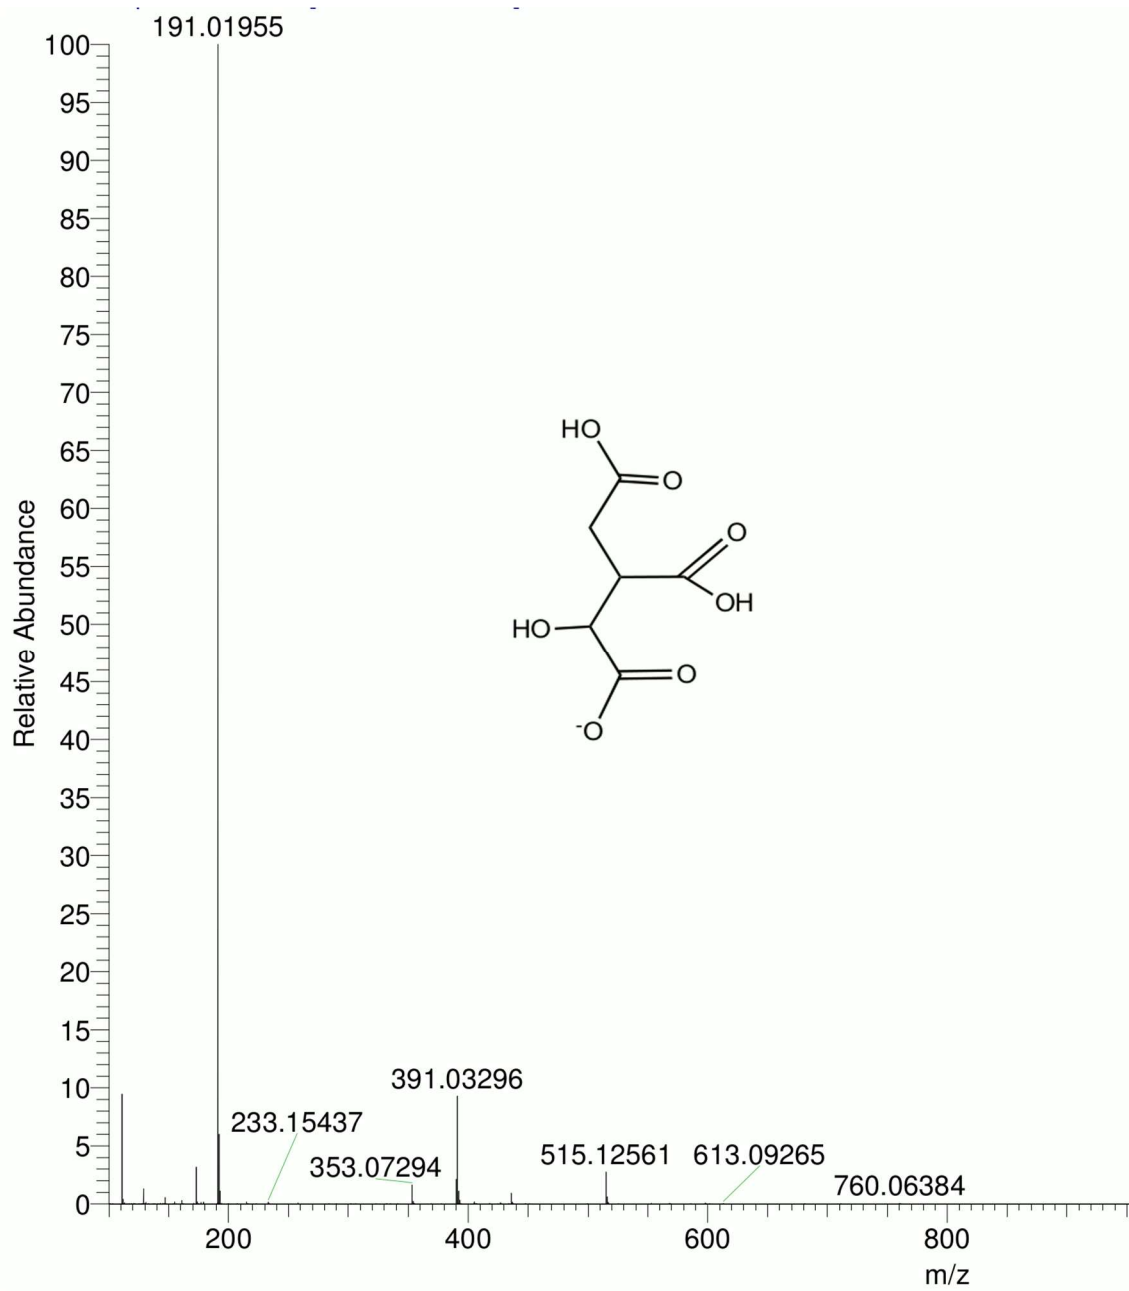

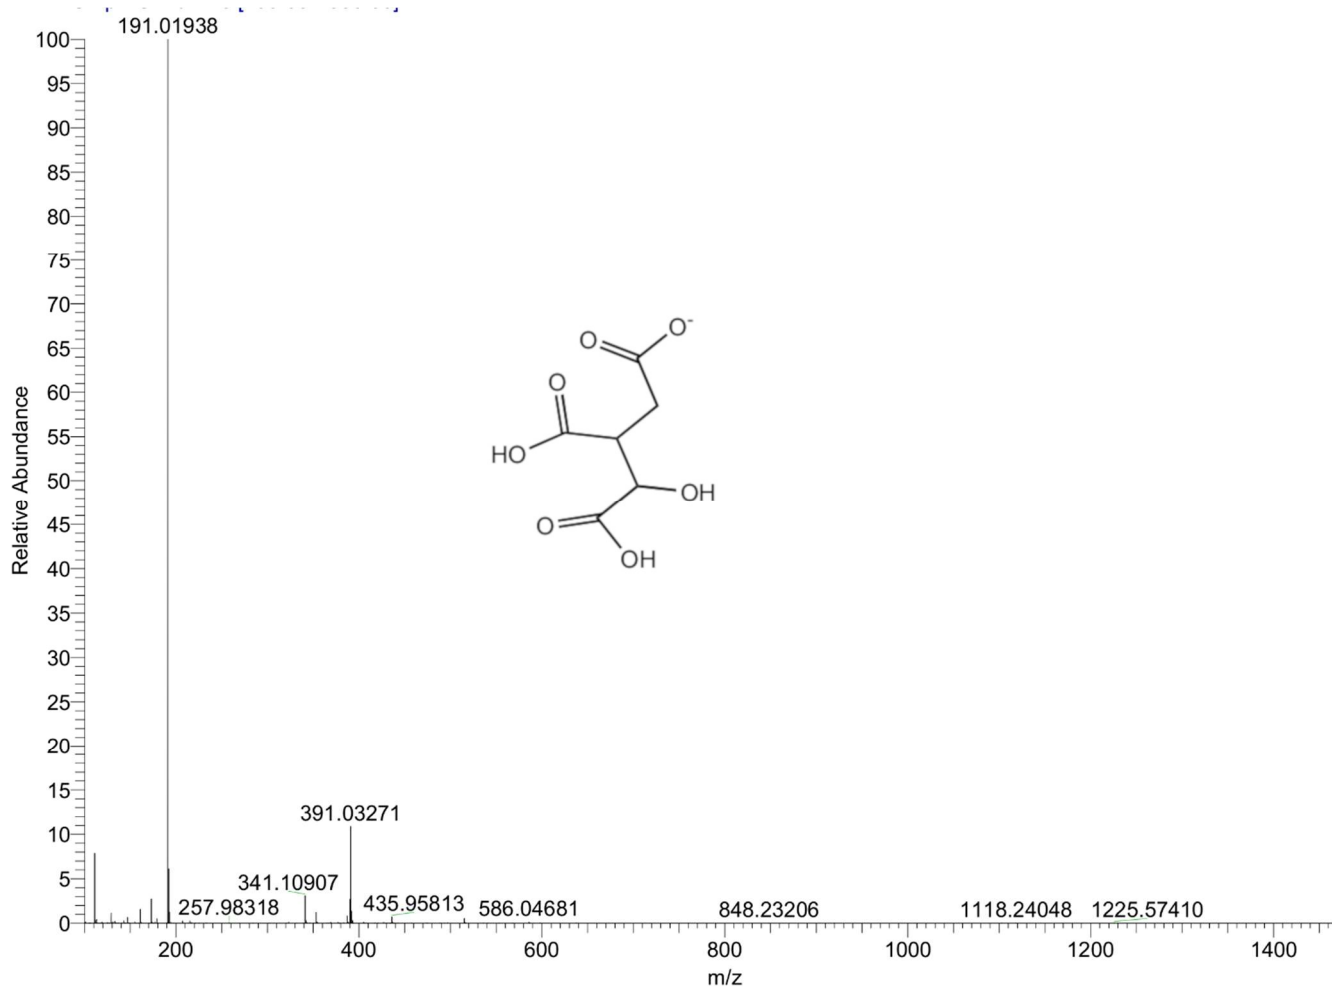

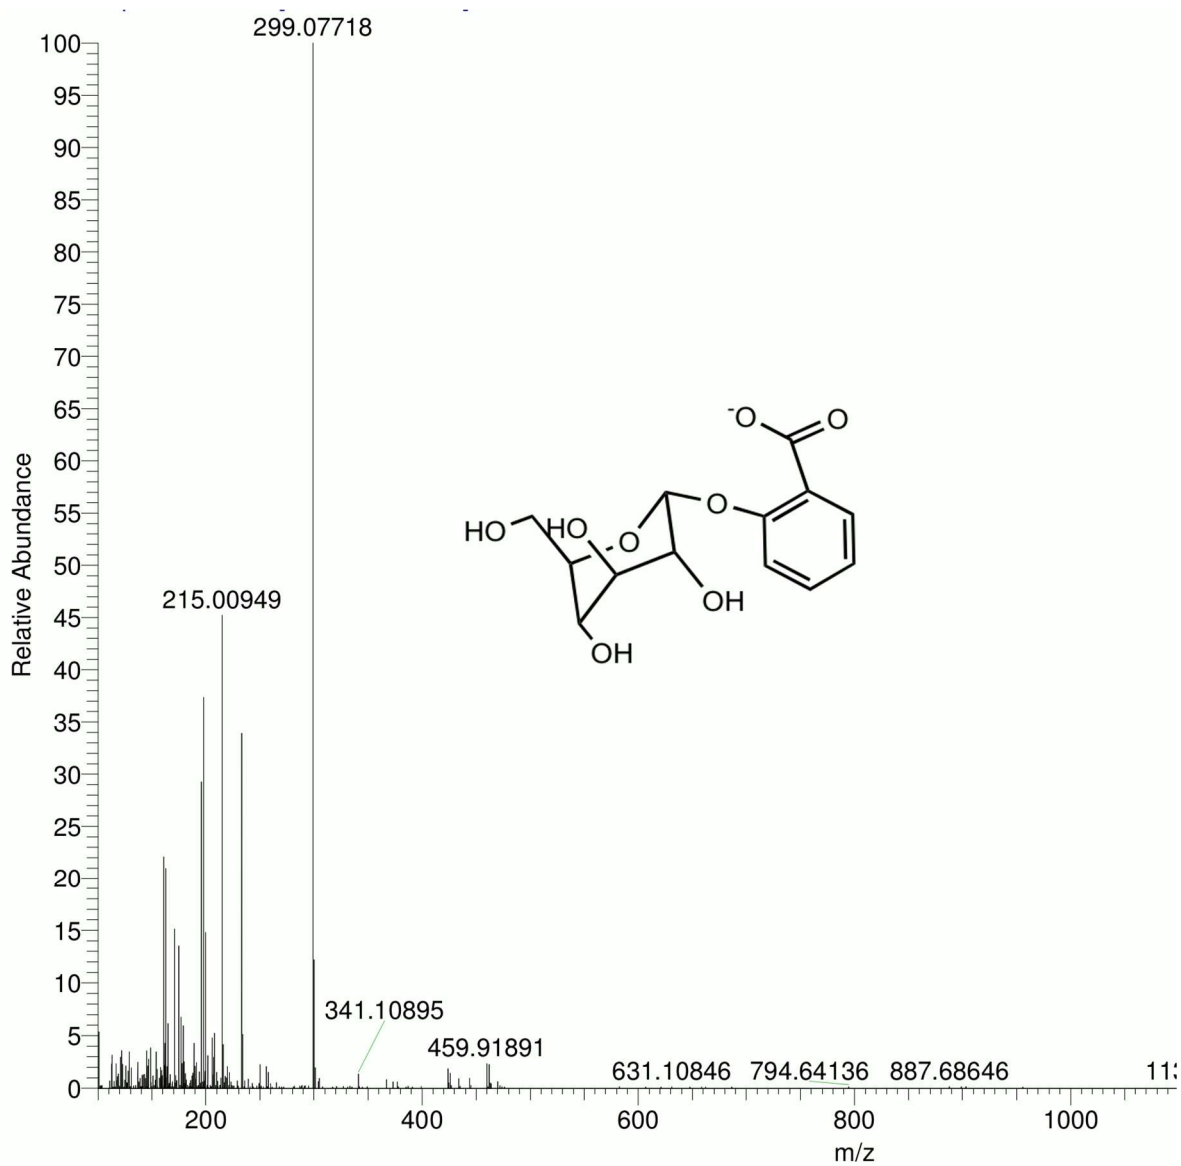

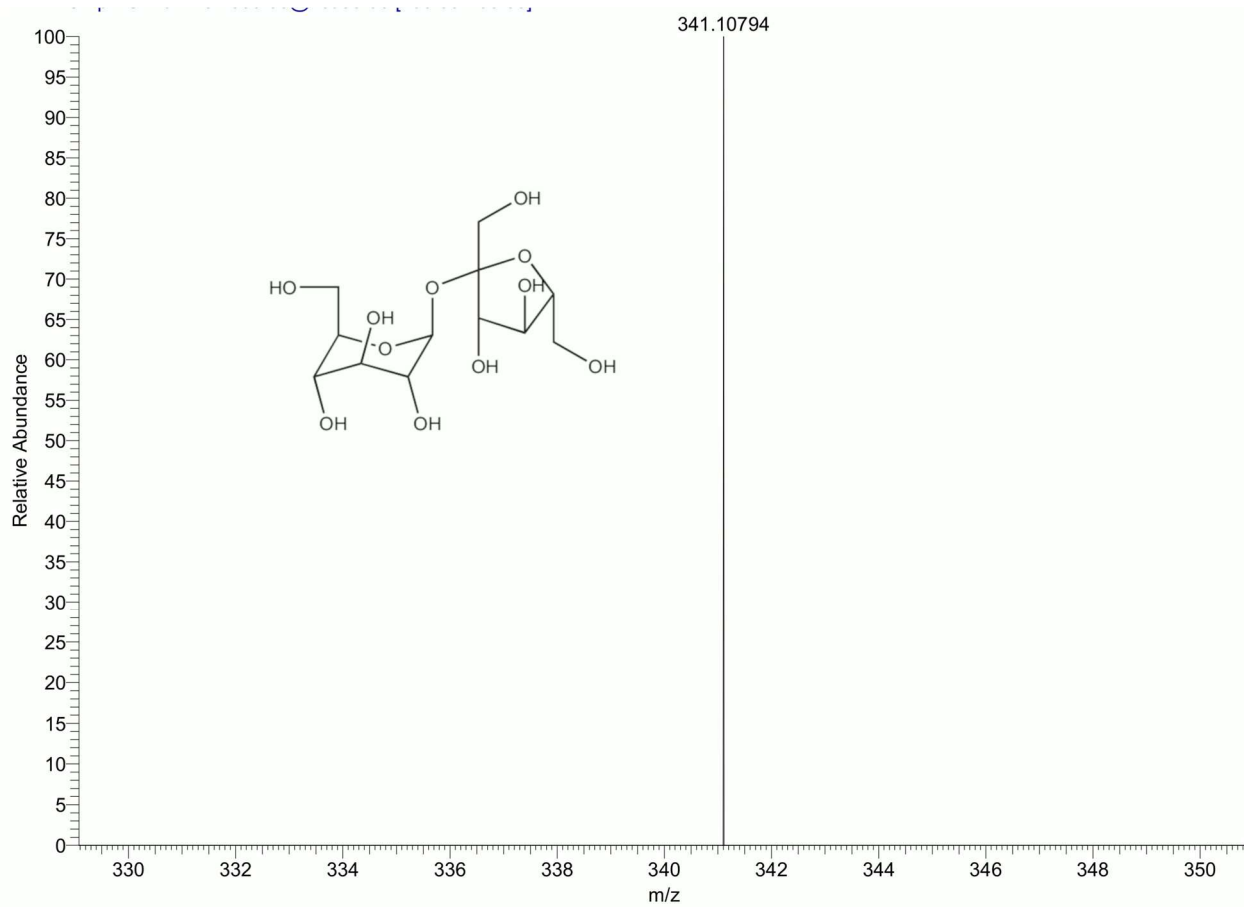

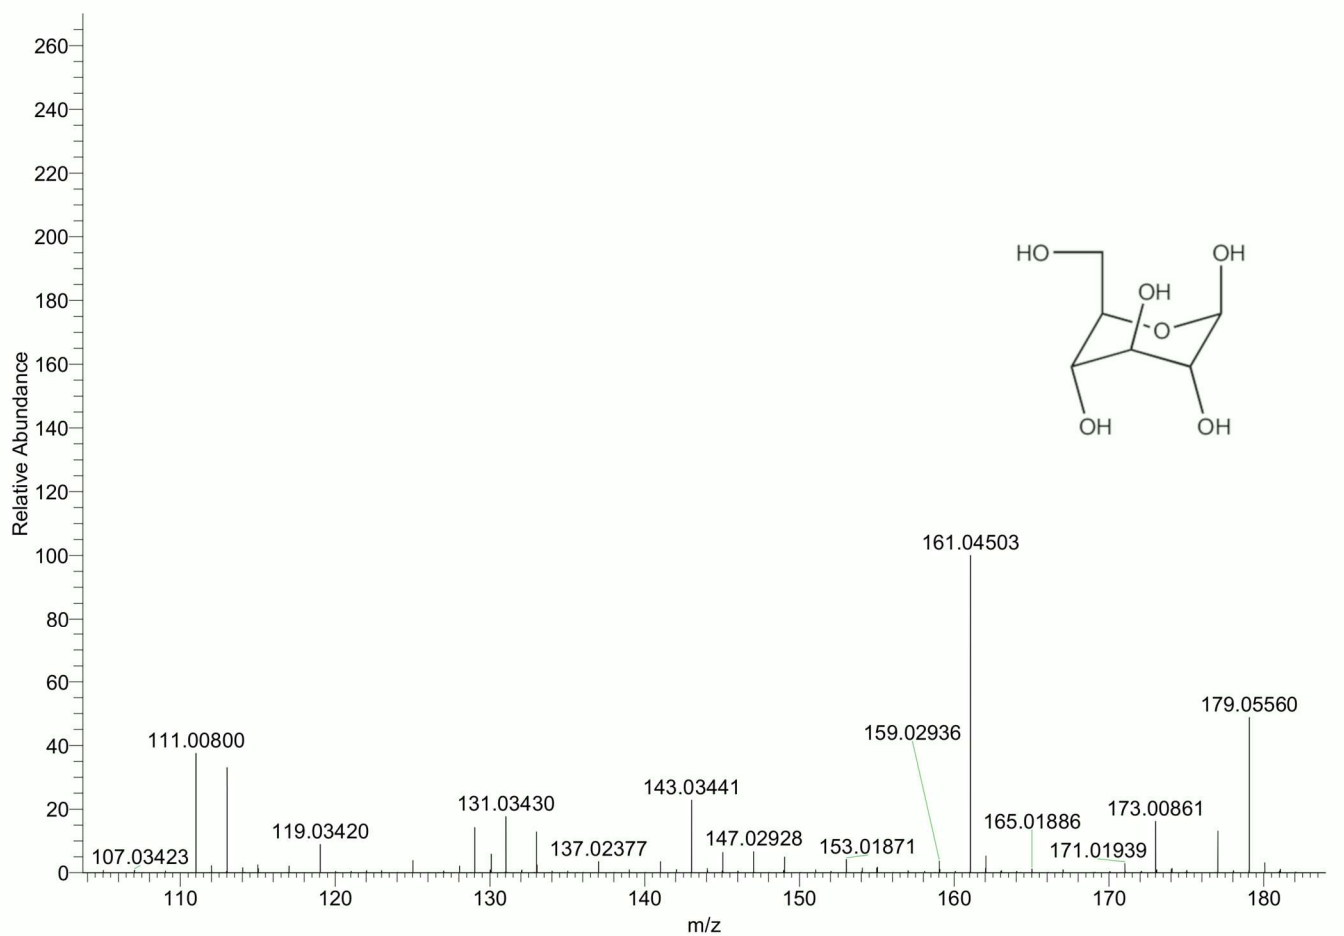

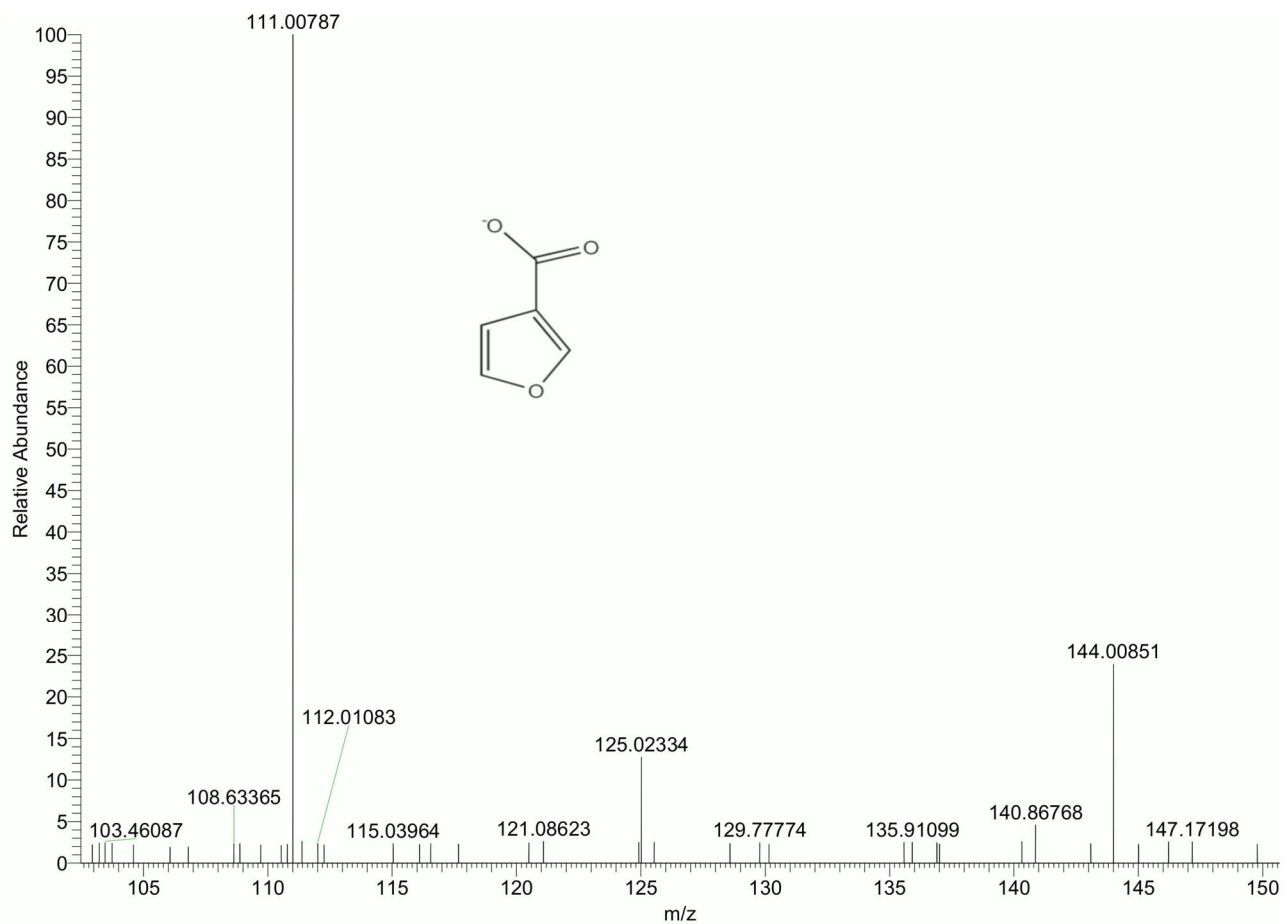



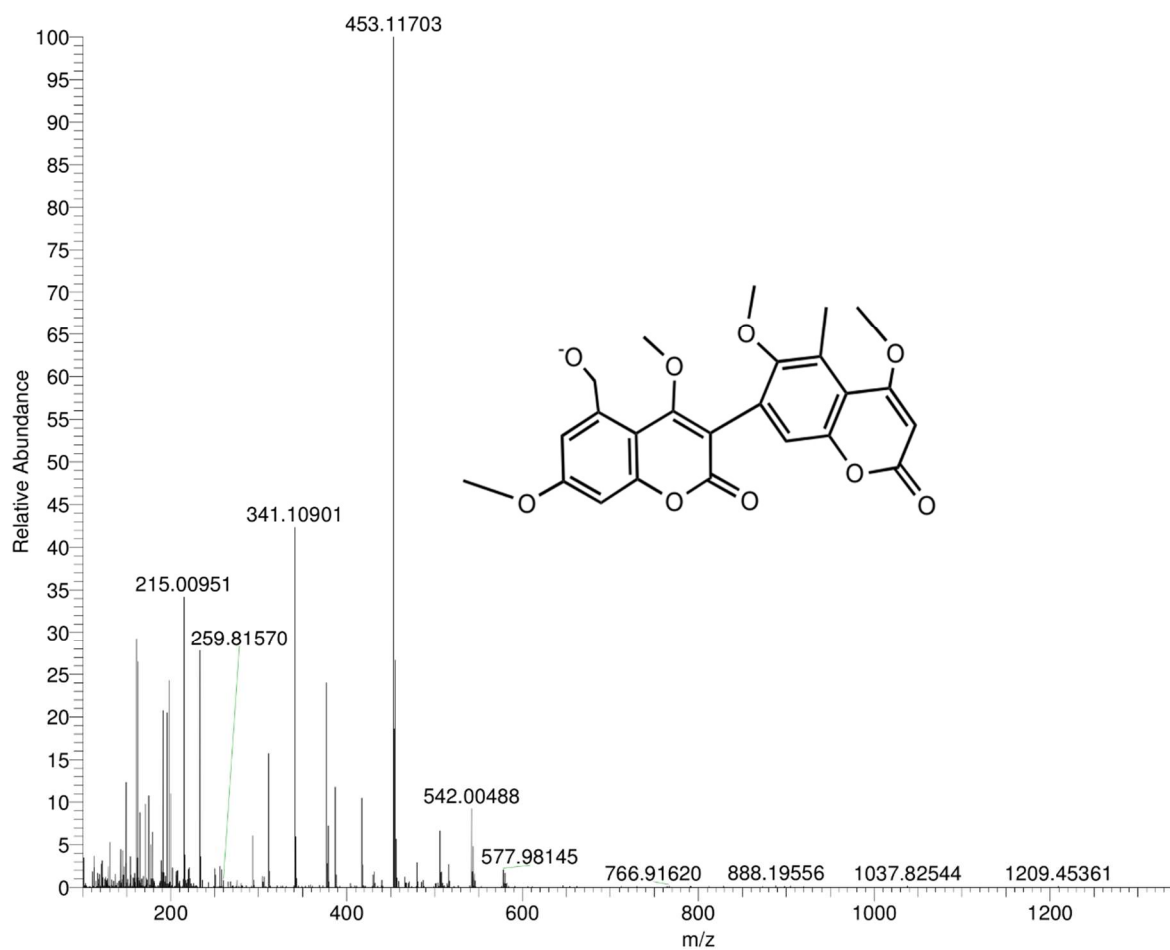



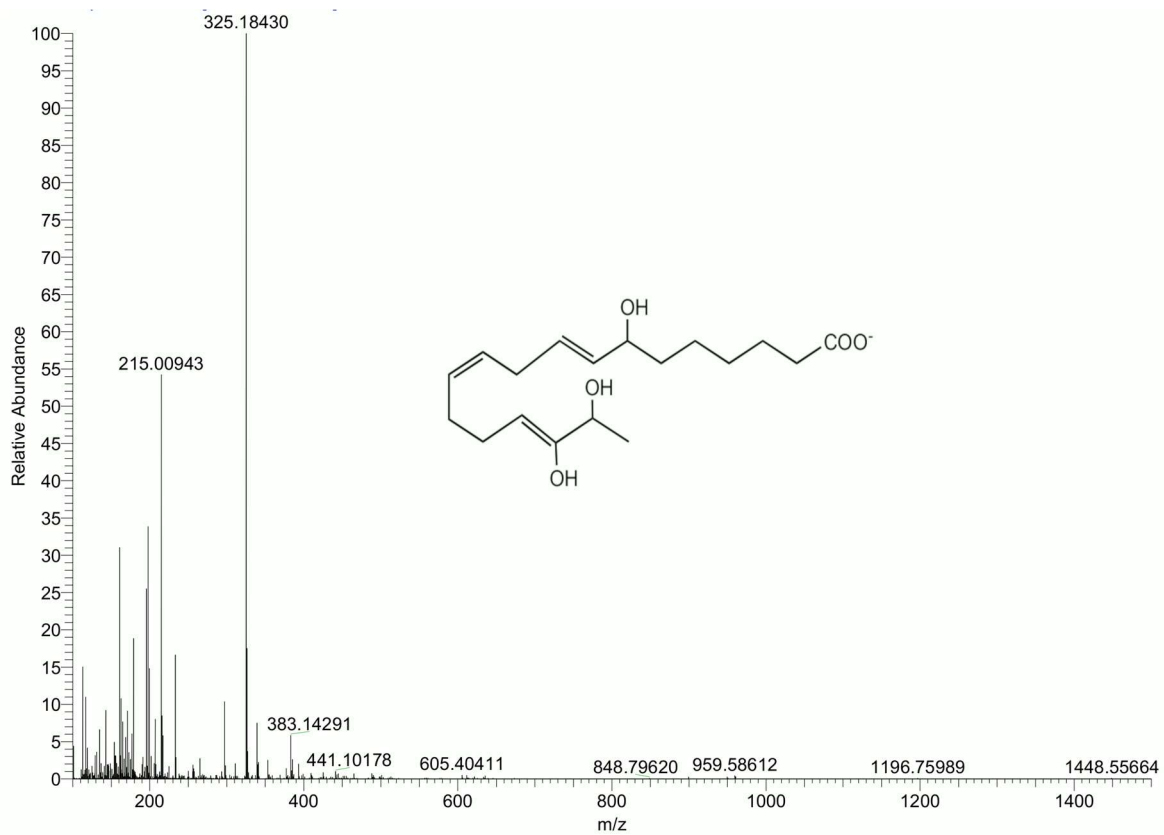

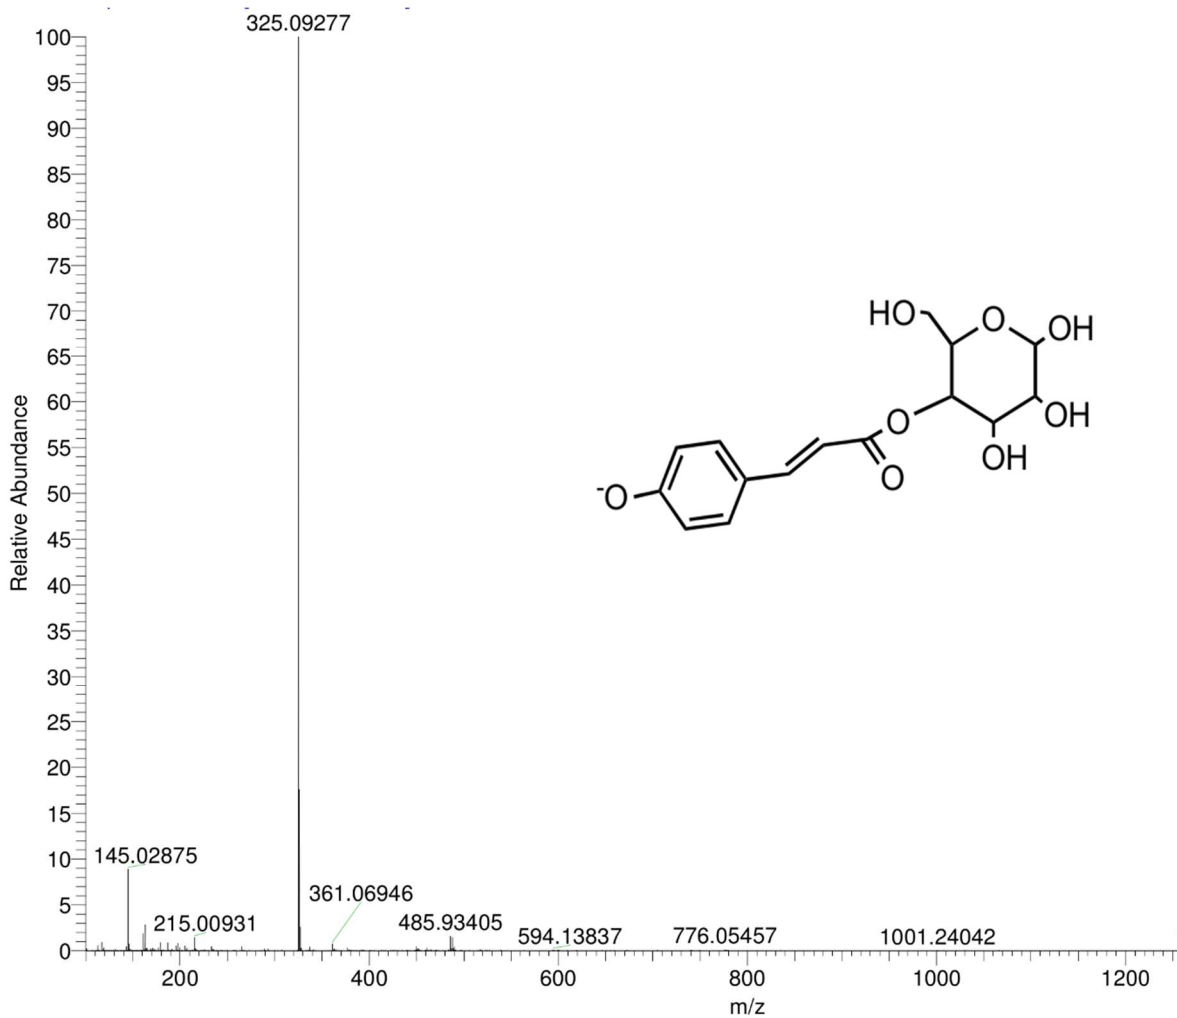

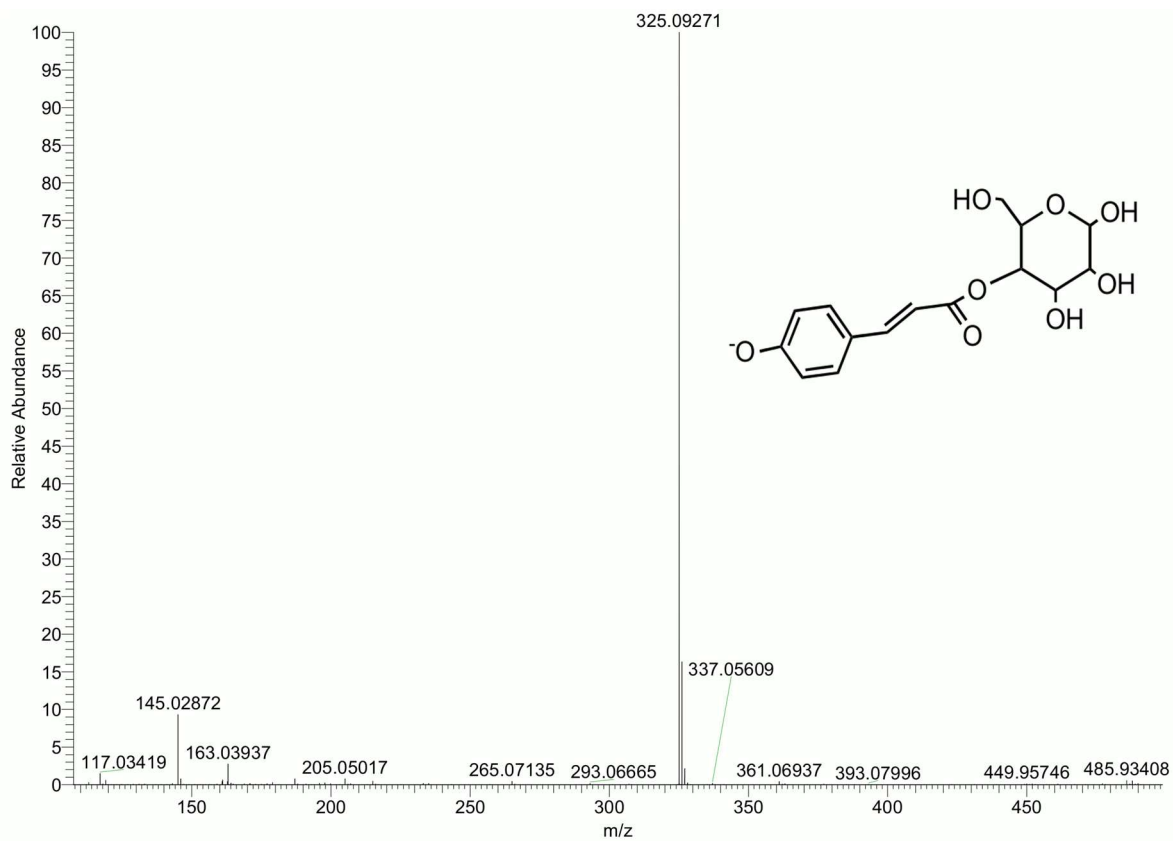

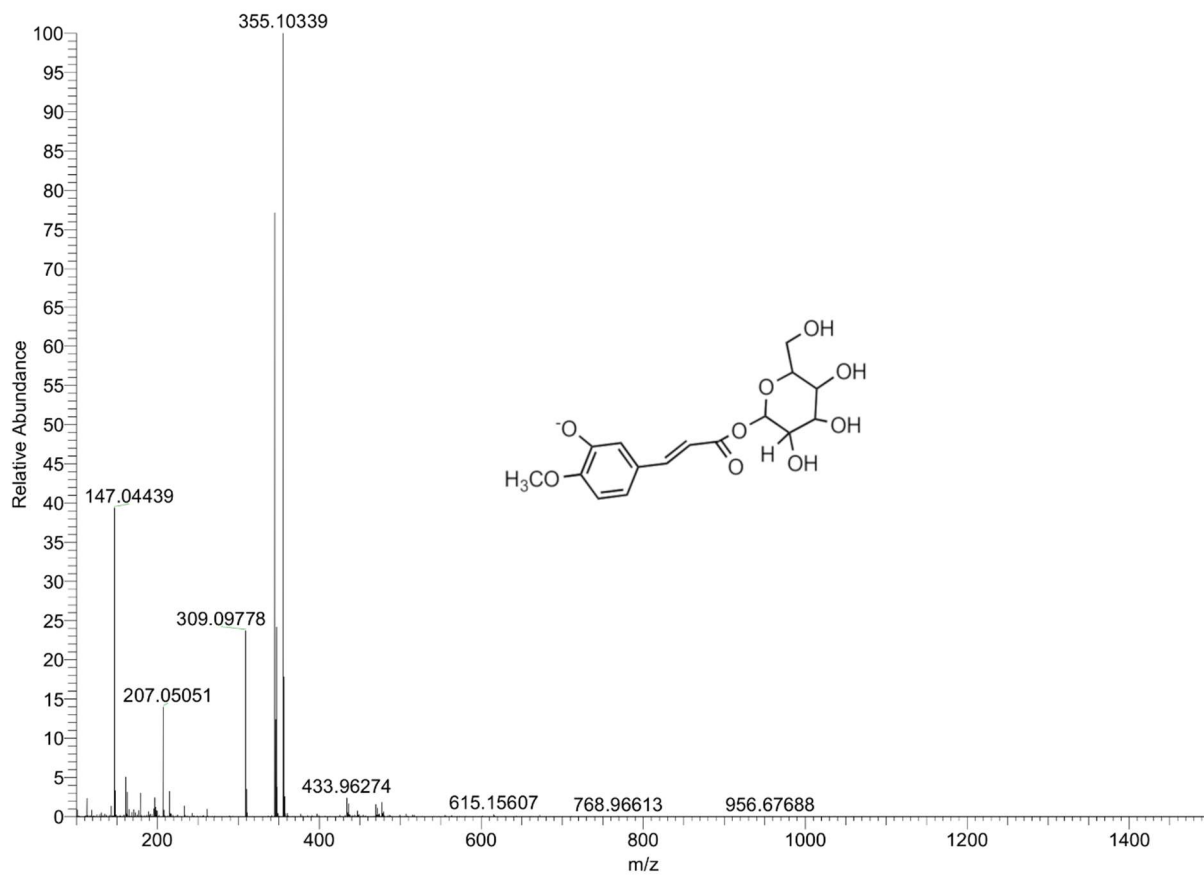

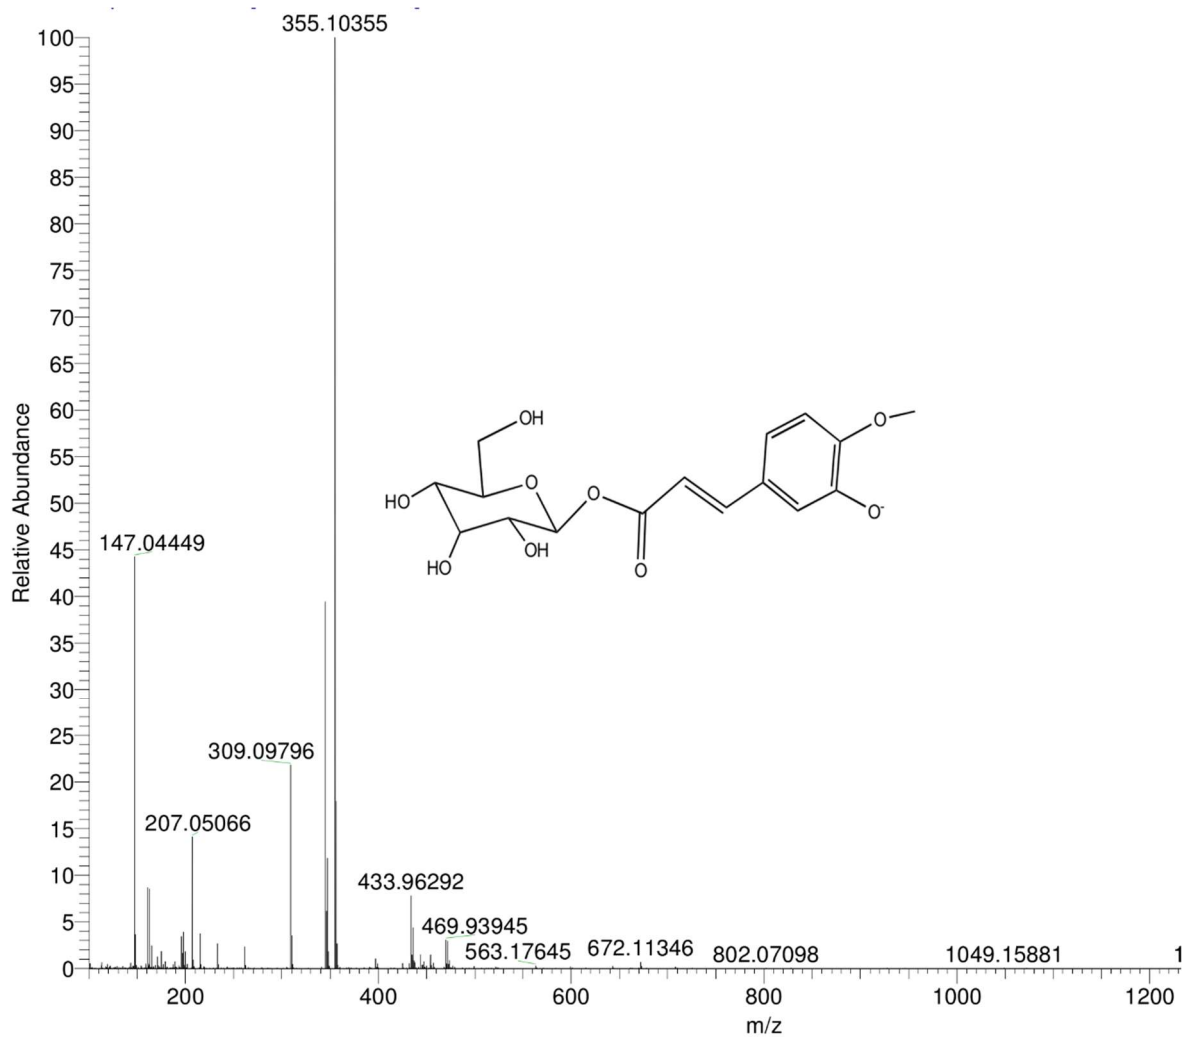

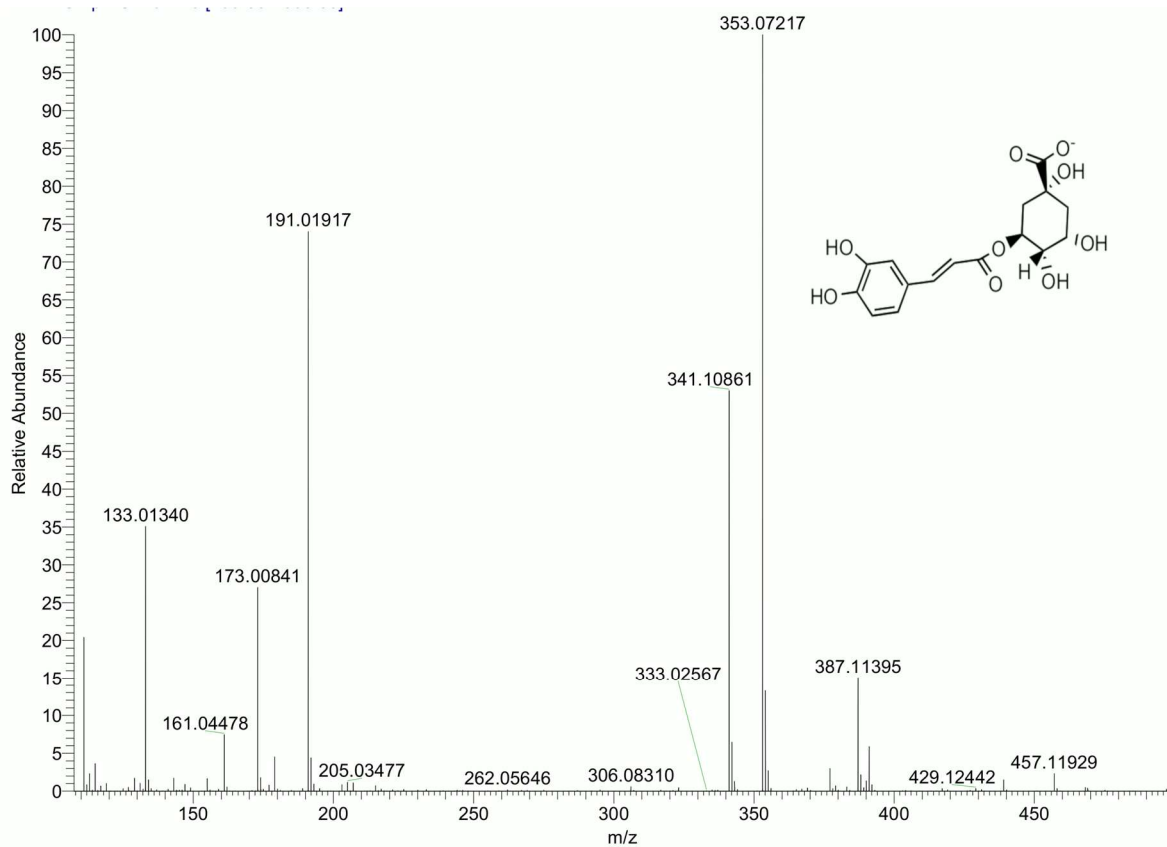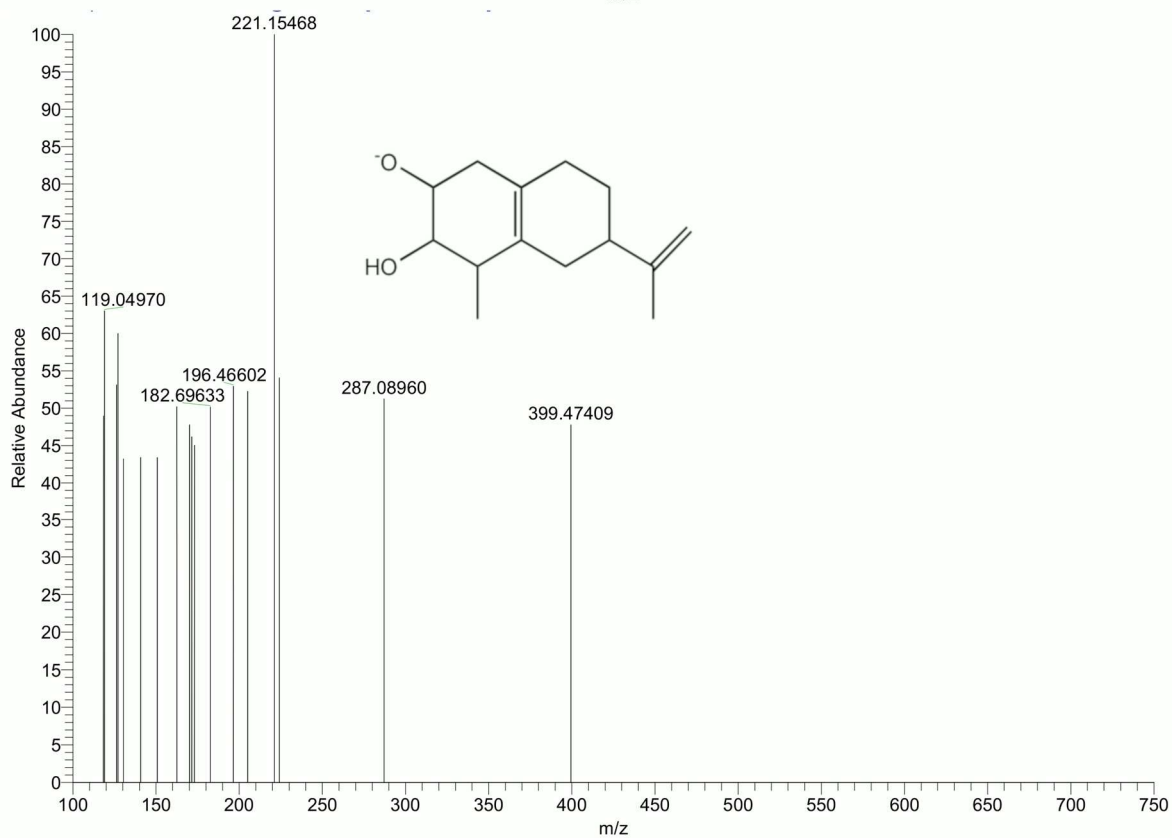

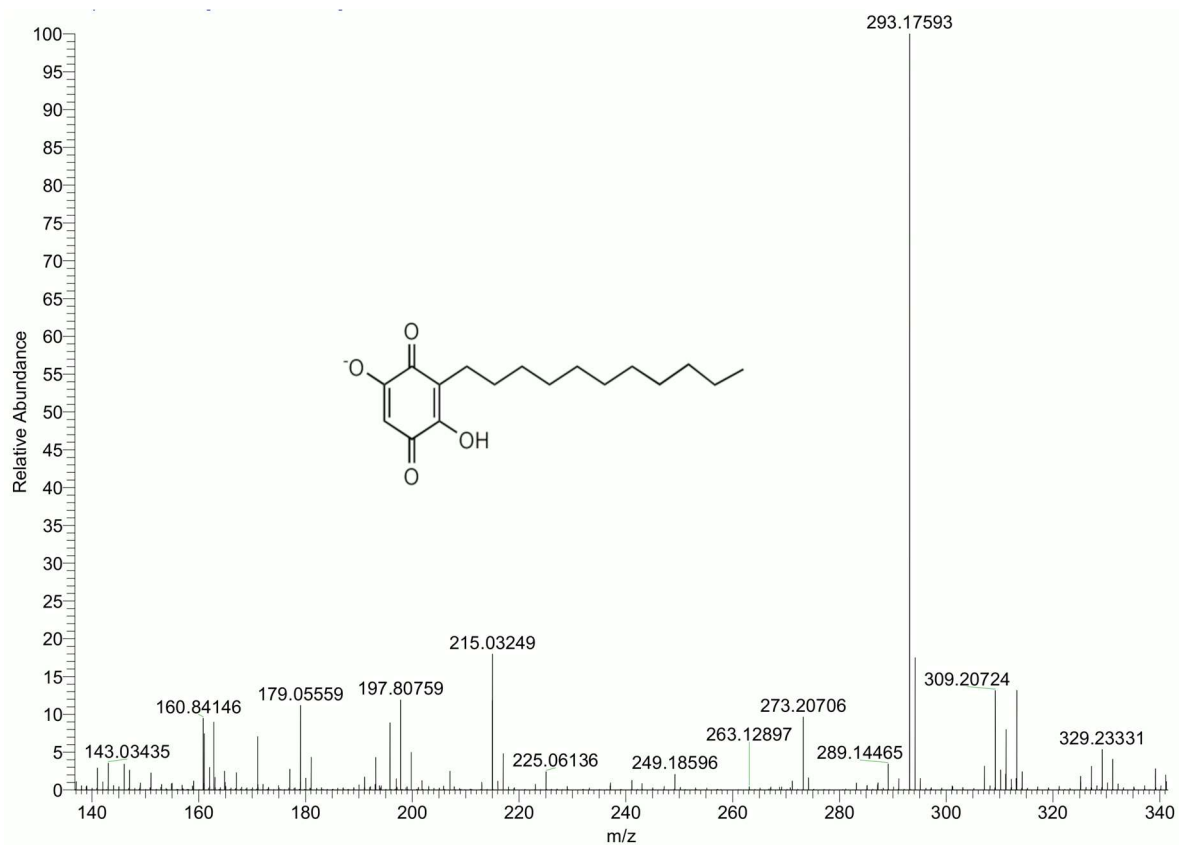

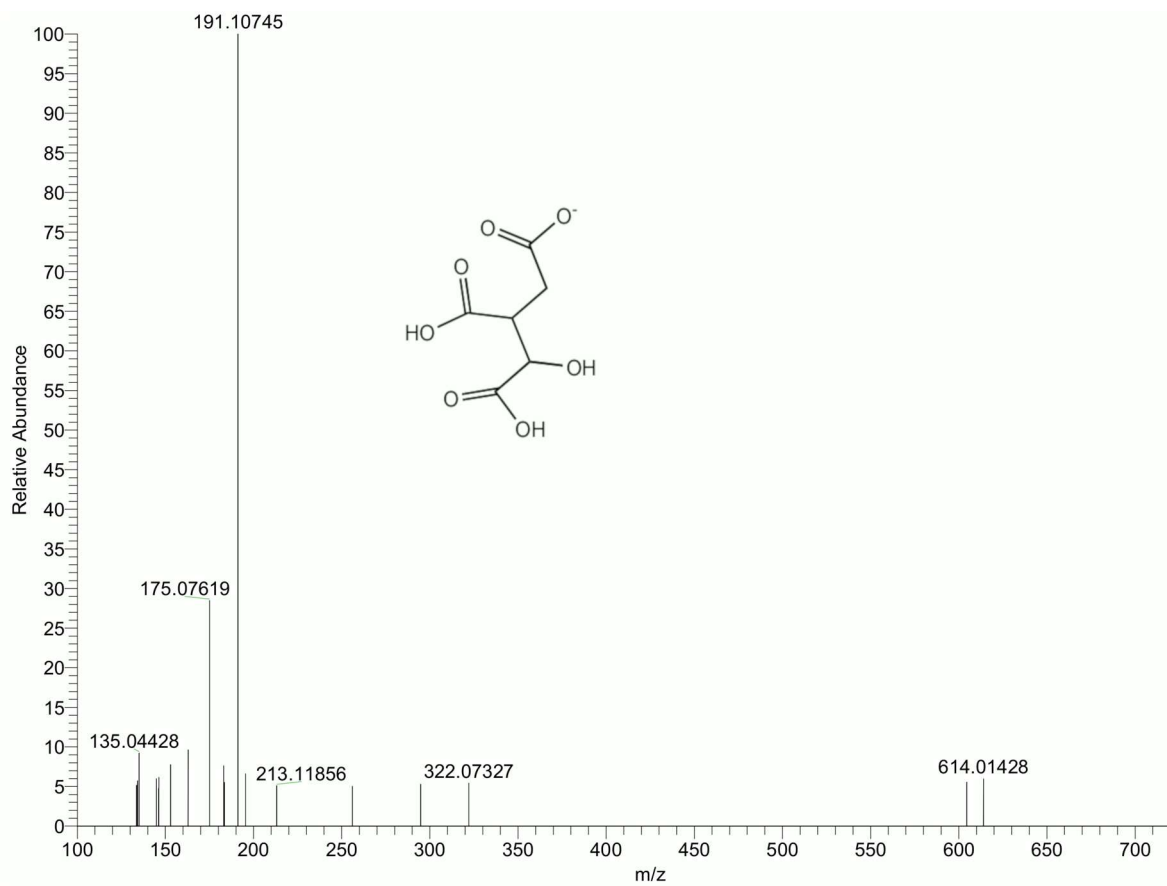



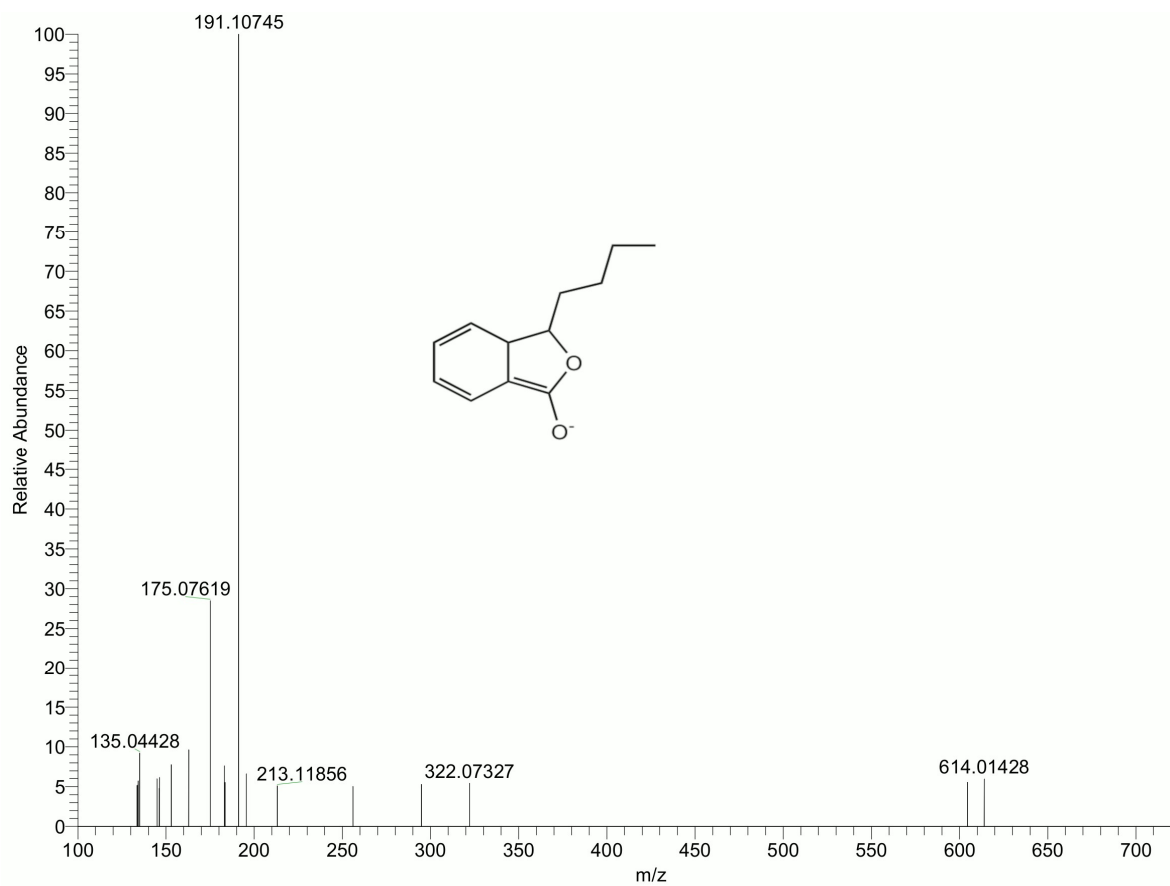

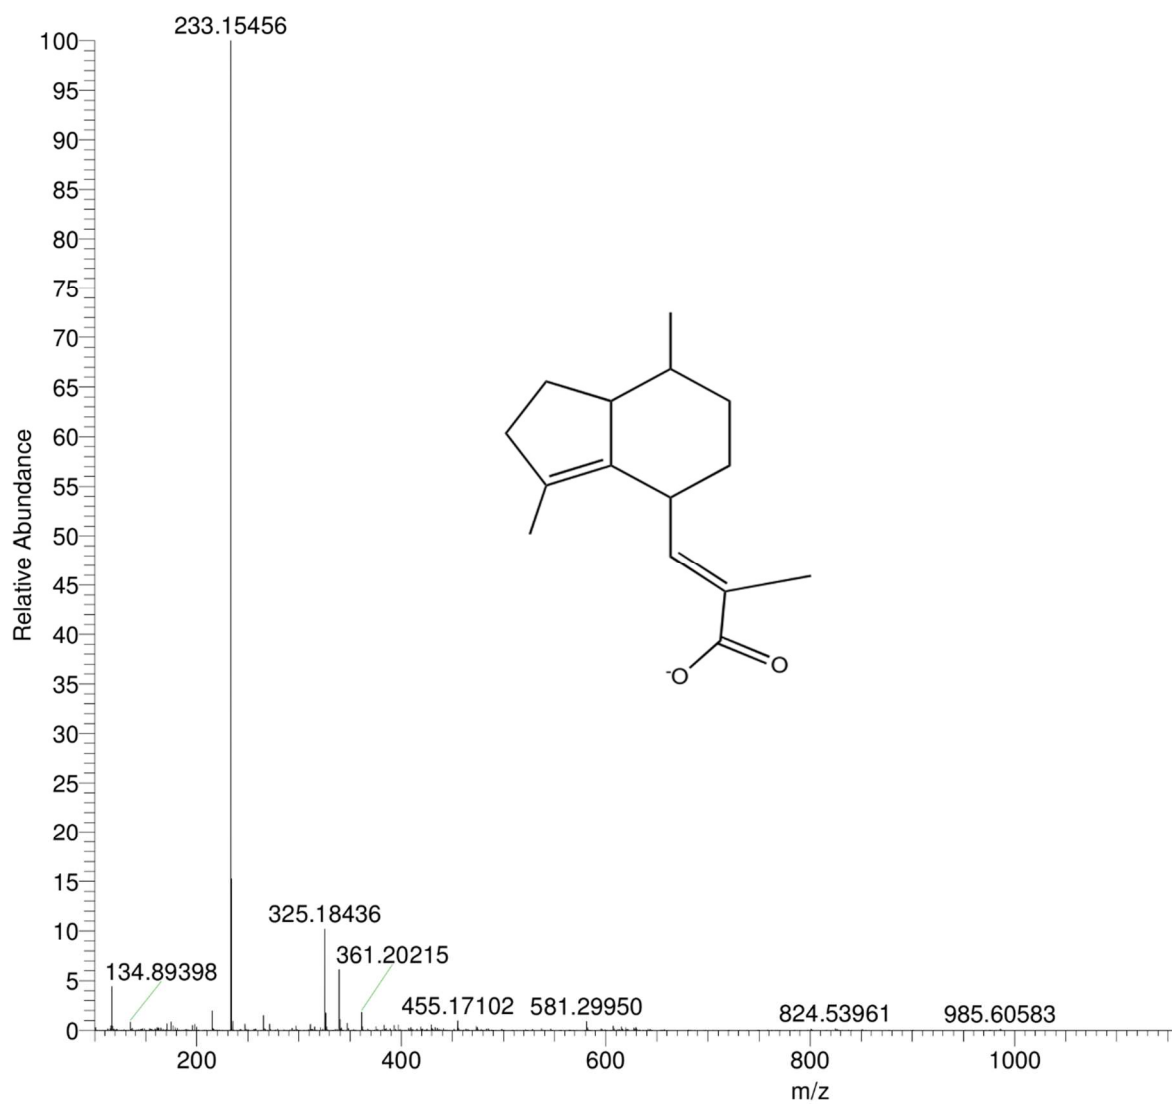

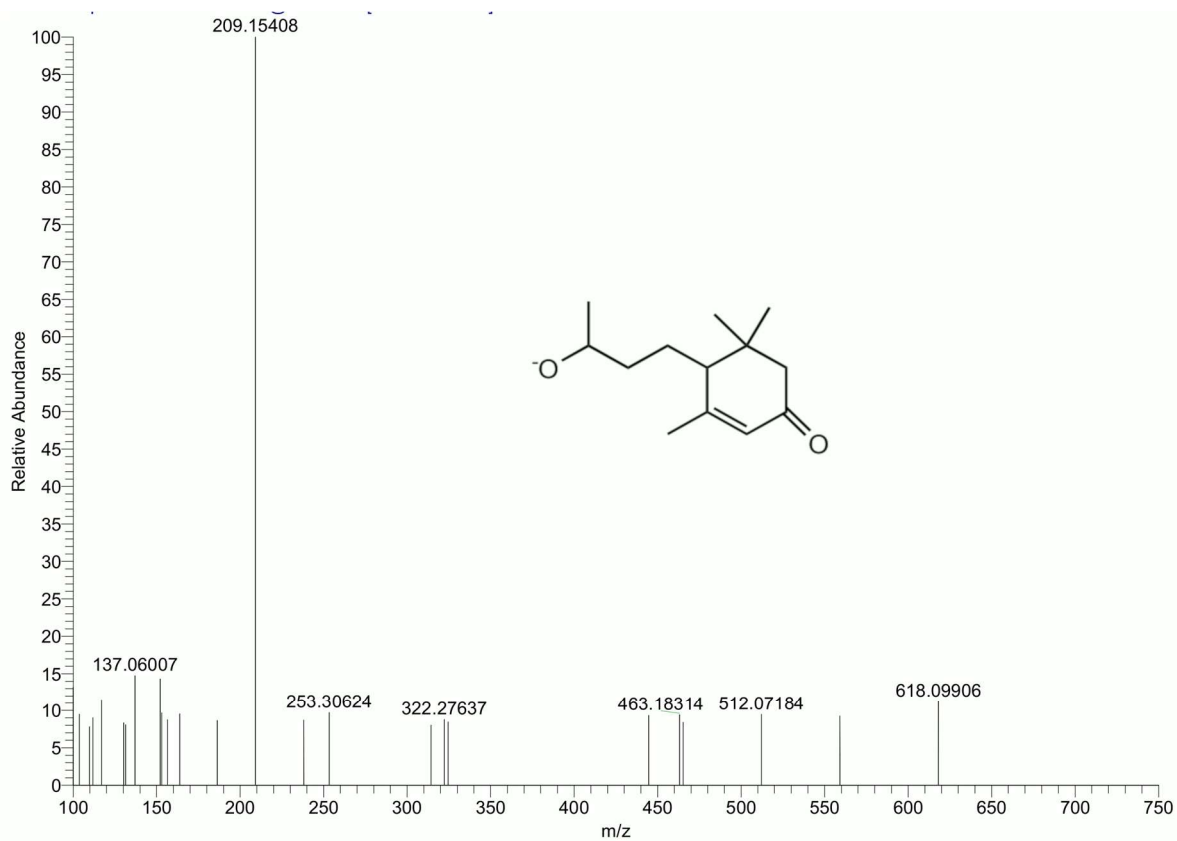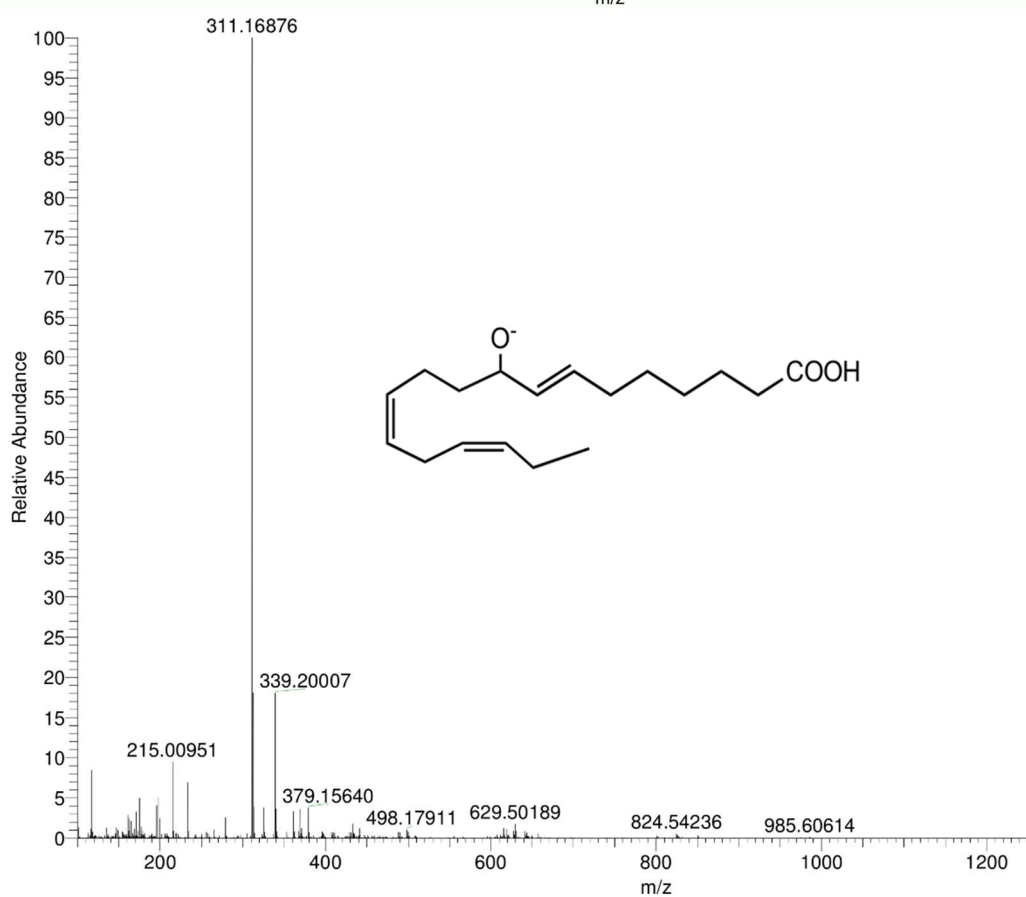

Supplement: s1 [file s1]
